# Supplementary material for: Human Health Risks Related to Penicillin G and Oxytetracycline Residues Intake Through Beef Consumption and Consumer Knowledge About Drug Residues in Maroua, Far North of Cameroon
Source: PubMed Central journal article supplement (PMC7480011; doi:10.3389/fvets.2020.00478), 2020-08-26
Supplement: Data_Sheet_1.pdf [file Data_Sheet_1.pdf]

**Table 1.** Socio-economic and demographic characteristics of the interviewees in the household (6).

| <b>Variables</b>                             | <b>Percentage (%)</b> | <b>Sample size (No. of household)</b> |
|----------------------------------------------|-----------------------|---------------------------------------|
| <i>Age (years)</i> <sup>+</sup>              |                       | 202                                   |
| < 10                                         | 0                     |                                       |
| [11-15]                                      | 4.1                   |                                       |
| [16-25]                                      | 26.9                  |                                       |
| [26-45]                                      | 53.8                  |                                       |
| >45                                          | 15.2                  |                                       |
| <i>Religion</i> <sup>++</sup>                |                       | 201                                   |
| Christian                                    | 55.2                  |                                       |
| Muslim                                       | 43.8                  |                                       |
| Animist                                      | 1.0                   |                                       |
| <i>Marital status</i>                        |                       | 200                                   |
| Single                                       | 12.0                  |                                       |
| Married                                      | 81.0                  |                                       |
| Divorcee                                     | 1.5                   |                                       |
| Widowed                                      | 5.5                   |                                       |
| <i>Educational level</i>                     |                       | 200                                   |
| No formal education                          | 32.0                  |                                       |
| Koranic                                      | 10.5                  |                                       |
| Primary                                      | 28.0                  |                                       |
| Secondary                                    | 24.5                  |                                       |
| University                                   | 5.0                   |                                       |
| <i>Family income</i>                         |                       | 158                                   |
| < \$30                                       | 15.2                  |                                       |
| [\$30-\$120]                                 | 44.3                  |                                       |
| > \$120                                      | 40.5                  |                                       |
| <i>Average number of people in the house</i> | 6.37                  | 202                                   |

(<sup>+</sup>): age of the principal interviewee; (<sup>++</sup>): religion of the head of the household;  
Sample correspond to the number of household and each of them has an average of 7 persons.

**Table 2.** Some variables of meat consumption (6).

| <b>Variable</b>                       | <b>Percentage (%)</b> | <b>Sample size (No. of households)</b> |
|---------------------------------------|-----------------------|----------------------------------------|
| <i>Eat meat**</i>                     | 95.50                 | 202                                    |
| <i>Meat more eaten**</i>              |                       | 199                                    |
| Beef                                  | 72.36                 |                                        |
| Sheep                                 | 5.02                  |                                        |
| Goat                                  | 20.60                 |                                        |
| Chicken                               | 1.01                  |                                        |
| Pork                                  | 1.01                  |                                        |
| <i>Eat beef**</i>                     | 97.90                 | 193                                    |
| <i>Frequency of beef consumption*</i> |                       | 196                                    |
| Every day                             | 10.7                  |                                        |
| Twice or three times a week           | 38.8                  |                                        |
| Once a week                           | 12.8                  |                                        |
| Twice or three times a month          | 10.7                  |                                        |
| Once a month                          | 4.1                   |                                        |
| Rarely                                | 22.4                  |                                        |
| Do not know                           | 0.5                   |                                        |

\* $P < 0.05$ , \*\* $P < 0.01$ ; Sample correspond to household and each of them has an average of 7 persons.

**Table 3.** Quantity of beef consumed per person in Maroua (6).

| <b>Variable</b>                             | <b>Per day (g)</b>          | <b>Per month (g)</b>          |
|---------------------------------------------|-----------------------------|-------------------------------|
| <i>Quantity of beef consumed per person</i> | 133.25 ± 33.49              | 1296.50 ± 239.41              |
| <i>Age</i>                                  |                             |                               |
| 0-15                                        | 92.78 ± 6.22 <sup>c</sup>   | 524.99 ± 119.80 <sup>b</sup>  |
| 16-45                                       | 151.84 ± 15.63 <sup>b</sup> | 1151.10 ± 86.83 <sup>a</sup>  |
| > 45                                        | 179.22 ± 40.93 <sup>a</sup> | 1332.63 ± 329.72 <sup>a</sup> |
| <i>Household monthly income+</i>            |                             |                               |
| Low                                         | 157.21 ± 11.92 <sup>a</sup> | 1306.65 ± 129.48 <sup>a</sup> |
| Average                                     | 129.77 ± 19.50 <sup>b</sup> | 1477.16 ± 380.86 <sup>a</sup> |
| High                                        | 130.0 ± 12.17 <sup>b</sup>  | 1429.70 ± 152.05 <sup>a</sup> |
| <i>Religion</i>                             |                             |                               |
| Christian                                   | 135.39 ± 10.09 <sup>a</sup> | 1861.00 ± 731.62 <sup>a</sup> |
| Muslim                                      | 136.66 ± 15.24 <sup>a</sup> | 857.87 ± 32.10 <sup>b</sup>   |
| <i>Number of person in the household</i>    |                             |                               |
| <5                                          | 94.08 ± 17.76 <sup>a</sup>  | 684.13 ± 155.40 <sup>a</sup>  |
| 5 ≤ n < 10                                  | 94.78 ± 8.08 <sup>a</sup>   | 579.42 ± 152.49 <sup>a</sup>  |
| ≥ 10                                        | 79.96 ± 44.50 <sup>a</sup>  | 569.00 ± 265.56 <sup>a</sup>  |

(+) Correspond to the monthly income of the head in the household; Low, less than \$30; Average, \$30-\$120; High, more than \$120. The values represent the average consumption of beef in g. For the same variable, values with different letters of the alphabet in the same column are significantly different ( $P < 0.05$ ).

**Table 4.** Percentage (%) of cattle carcasses contaminated according to their demographics (9).

| <b>Variables</b>            | <b>PEN</b> | <b>OTC</b> | <b>OTC+PEN</b> |
|-----------------------------|------------|------------|----------------|
| <i>Age (year)</i>           |            |            |                |
| < 8 (n = 37)                | 18.92      | 0          | 18.92          |
| 8-10 (n = 101)              | 17.82      | 1.98       | 19.80          |
| > 10 (n = 59)               | 16.95      | 1.69       | 18.64          |
| ND (n = 5)                  | 60         | 0          | 60             |
| <i>Sex</i>                  |            |            |                |
| Entired male (n = 13)       | 15.38      | 0          | 15.38          |
| Castrated male (n = 4)      | 0          | 0          | 0              |
| Female (n = 185)            | 19.46      | 1.49       | 21.08          |
| <i>Production system*</i>   |            |            |                |
| Transhumance (n = 16)       | 25         | 6.25       | 31.25          |
| Sedentary (n = 62)          | 19.35      | 0          | 19.35          |
| <i>Type of production*</i>  |            |            |                |
| Fattery (n = 46)            | 17.39      | 0          | 17.39          |
| Mixed (n = 30)              | 23.33      | 3.33       | 26.67          |
| ND (n = 125)                | 18.4       | 1.60       | 20             |
| <i>Health status**</i>      |            |            |                |
| Sick (n = 21)               | 80.95      | 4.76       | 85.71          |
| Healthy (n = 181)           | 11.60      | 1.10       | 12.70          |
| <i>Body condition score</i> |            |            |                |
| Thin (n = 131)              | 18.32      | 1.53       | 19.85          |
| Normal (n = 69)             | 18.84      | 1.45       | 20.30          |
| Fat (n = 1)                 | 100        | 0          | 100            |
| <i>Breed*</i>               |            |            |                |
| Goudali (n = 13)            | 23.08      | 0          | 23.08          |
| White Fulani (n = 65)       | 18.46      | 1.54       | 20             |
| Red Fulani (n = 96)         | 20.83      | 2.08       | 22.92          |
| Arabe Shuwa (n = 8)         | 12.5       | 0          | 12.5           |
| Toupouri (n = 3)            | 33.33      | 0          | 33.33          |
| Kapsiki (n = 9)             | 11.11      | 0          | 11.11          |
| Peul (n = 1)                | 0          | 0          | 0              |
| ND (n = 7)                  | 0          | 0          | 0              |
| <i>Slaughterhouses</i>      |            |            |                |
| Municipal (n = 115)         | 22.22      | 0          | 22.22          |
| Makabaye (n = 45)           | 26.92      | 0          | 26.92          |
| Kongola (n = 26)            | 25         | 12.5       | 37.5           |
| Meskine (n = 8)             | 0          | 0          | 0              |
| Salak (n = 5)               | 100        | 0          | 100            |
| Godola (n = 3)              |            |            |                |

*PEN* : penicillin G ; *OTC* : Oxytetracycline; *ND*: No determined; \*P<0.05, \*\*P<0.01

**Table 5.** Concentration ( $\mu\text{g/g}$ ) of penicillin residues on beef according to cattle demographics (9).

| <b>Variable</b>               | <b>Mean</b> | <b>Median</b> | <b>Maximum</b> | <b>Minimum</b> |
|-------------------------------|-------------|---------------|----------------|----------------|
| <i>Sex</i>                    |             |               |                |                |
| Male (n = 3)                  | 0.109       | 0.068         | 0.198          | 0.068          |
| Female (n = 35)               | 0.140       | 0.072         | 0.773          | 0.001          |
| <i>Age (year)</i>             |             |               |                |                |
| < 8 (n = 7)                   | 0.108       | 0.094         | 0.198          | 0.009          |
| [8 ; 10] (n = 17)             | 0.106       | 0.013         | 0.773          | 0.001          |
| > 10 (n = 14)                 | 0.192       | 0.106         | 0.734          | 0.003          |
| <i>Breed</i>                  |             |               |                |                |
| Red Fulani (n = 21)           | 0.143       | 0.072         | 0.773          | 0.001          |
| White Fulani (n = 12)         | 0.144       | 0.067         | 0.734          | 0.001          |
| Goudali (n = 2)               | 0.061       | 0.061         | 0.068          | 0.054          |
| Kapsiki (n = 1)               | 0.088       | /             | /              | /              |
| Arabe Shuwa (n = 1)           | 0.119       | /             | /              | /              |
| Toupouri (n = 1)              | 0.182       | /             | /              | /              |
| <i>Tissus</i>                 |             |               |                |                |
| Muscle (n = 5)                | 0.054       | 0.055         | 0.090          | 0.009          |
| Liver (n = 33)                | 0.151       | 0.087         | 0.773          | 0.001          |
| <i>Body condition scoring</i> |             |               |                |                |
| Fat (n = 2)                   | 0.128       | 0.128         | 0.196          | 0.061          |
| Normal (n = 13)               | 0.164       | 0.087         | 0.734          | 0.001          |
| Thin (n = 23)                 | 0.124       | 0.066         | 0.773          | 0.001          |
| <i>Health status</i>          |             |               |                |                |
| Sick (n = 16)                 | 0.163       | 0.090         | 0.773          | 0.001          |
| Healthy (n = 22)              | 0.120       | 0.062         | 0.734          | 0.001          |
| <i>Type of production</i>     |             |               |                |                |
| Fattening (n = 8)             | 0.096       | 0.061         | 0.337          | 0.001          |
| Mixed (n = 6)                 | 0.263       | 0.211         | 0.773          | 0.003          |
| ND (n = 24)                   | 0.121       | 0.070         | 0.734          | 0.001          |
| <i>Production system</i>      |             |               |                |                |
| Sedentary (n = 12)            | 0.144       | 0.067         | 0.773          | 0.001          |
| Transhumance (n = 3)          | 0.227       | 0.303         | 0.325          | 0.054          |
| ND (n = 23)                   | 0.123       | 0.072         | 0.734          | 0.001          |

ND: No determined
